# Supplementary material
Source: PubMed Central journal article supplement (PMC3532528)
Supplement: NIHMS430027-supplement-1_si_001.pdf [file NIHMS430027-supplement-1_si_001.pdf]

## Supplementary information for

### Glycolysis Inhibitor Screening Identifies the Bis-geranylacetylphloroglucinol Protonophore Moronone from *Moronobea coccinea*

Sandipan Datta,<sup>†</sup> Jun Li,<sup>†</sup> Fakhri Mahdi,<sup>†</sup> Mika B. Jekabsons,<sup>‡</sup> Dale G. Nagle,<sup>\*,†,§</sup> and Yu-Dong Zhou<sup>\*,†</sup>

<sup>†</sup>Department of Pharmacognosy and <sup>§</sup>Research Institute of Pharmaceutical Sciences, School of Pharmacy, University of Mississippi, University, Mississippi 38677, United States; <sup>‡</sup>Department of Biology, University of Mississippi, University, Mississippi 38677, United States

| Figure No. | Title                                                                  |
|------------|------------------------------------------------------------------------|
| S1         | Effects of rotenone and 2-DG combinations on MDA-MB-231 cell viability |
| S2         | <sup>1</sup> H NMR spectrum of moronone ( <b>1</b> )                   |
| S3         | <sup>13</sup> C NMR spectrum of moronone ( <b>1</b> )                  |
| S4         | gHSQC spectrum of moronone ( <b>1</b> )                                |
| S5         | gHMBC spectrum of moronone ( <b>1</b> )                                |
| S6         | gCOSY spectrum of moronone ( <b>1</b> )                                |
| S7         | gNOESY spectrum of moronone ( <b>1</b> )                               |

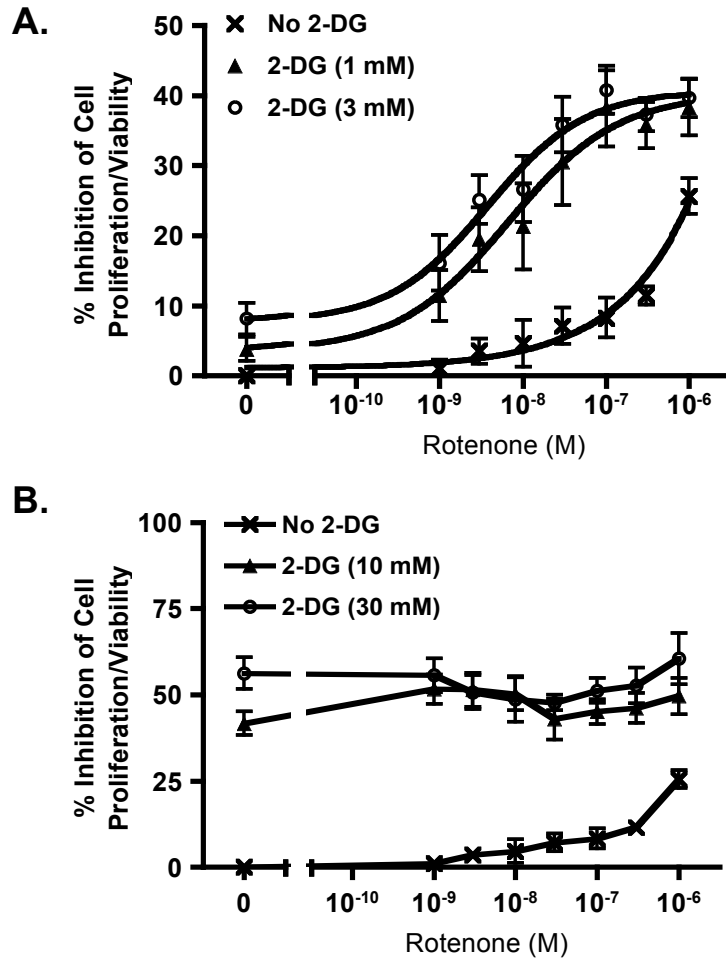

**Figure S1.** Effects of combinations of rotenone and 2-DG on MDA-MB-231 cell proliferation/viability. MDA-MB-231 cells were treated with 2-DG in the presence or absence of rotenone for 48 h at the specified concentration. Cell viability was determined by the sulforhodamine B method. Data shown are average  $\pm$  standard deviation from three independent experiments each performed in duplicate.

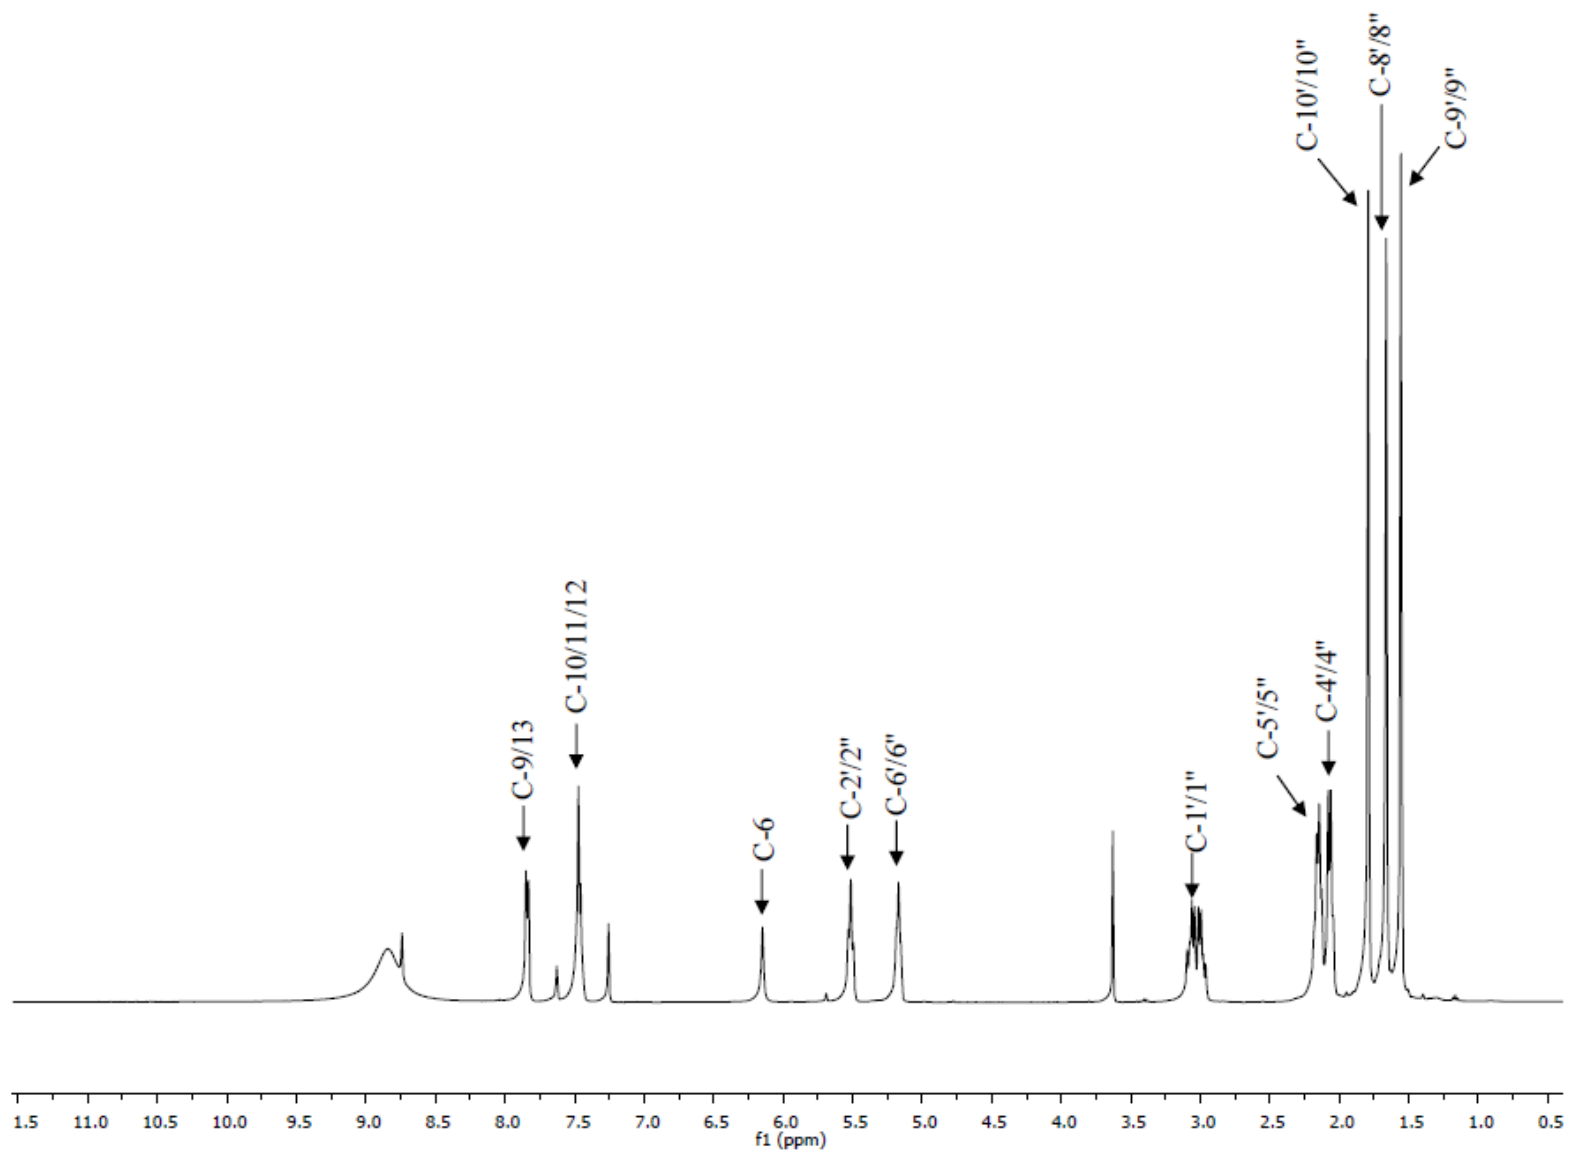

**Figure S2.**  $^1\text{H}$  NMR spectrum of moronone (1) in  $\text{pyridine-}d_5$ . Corresponding carbons for the proton resonances are indicated.

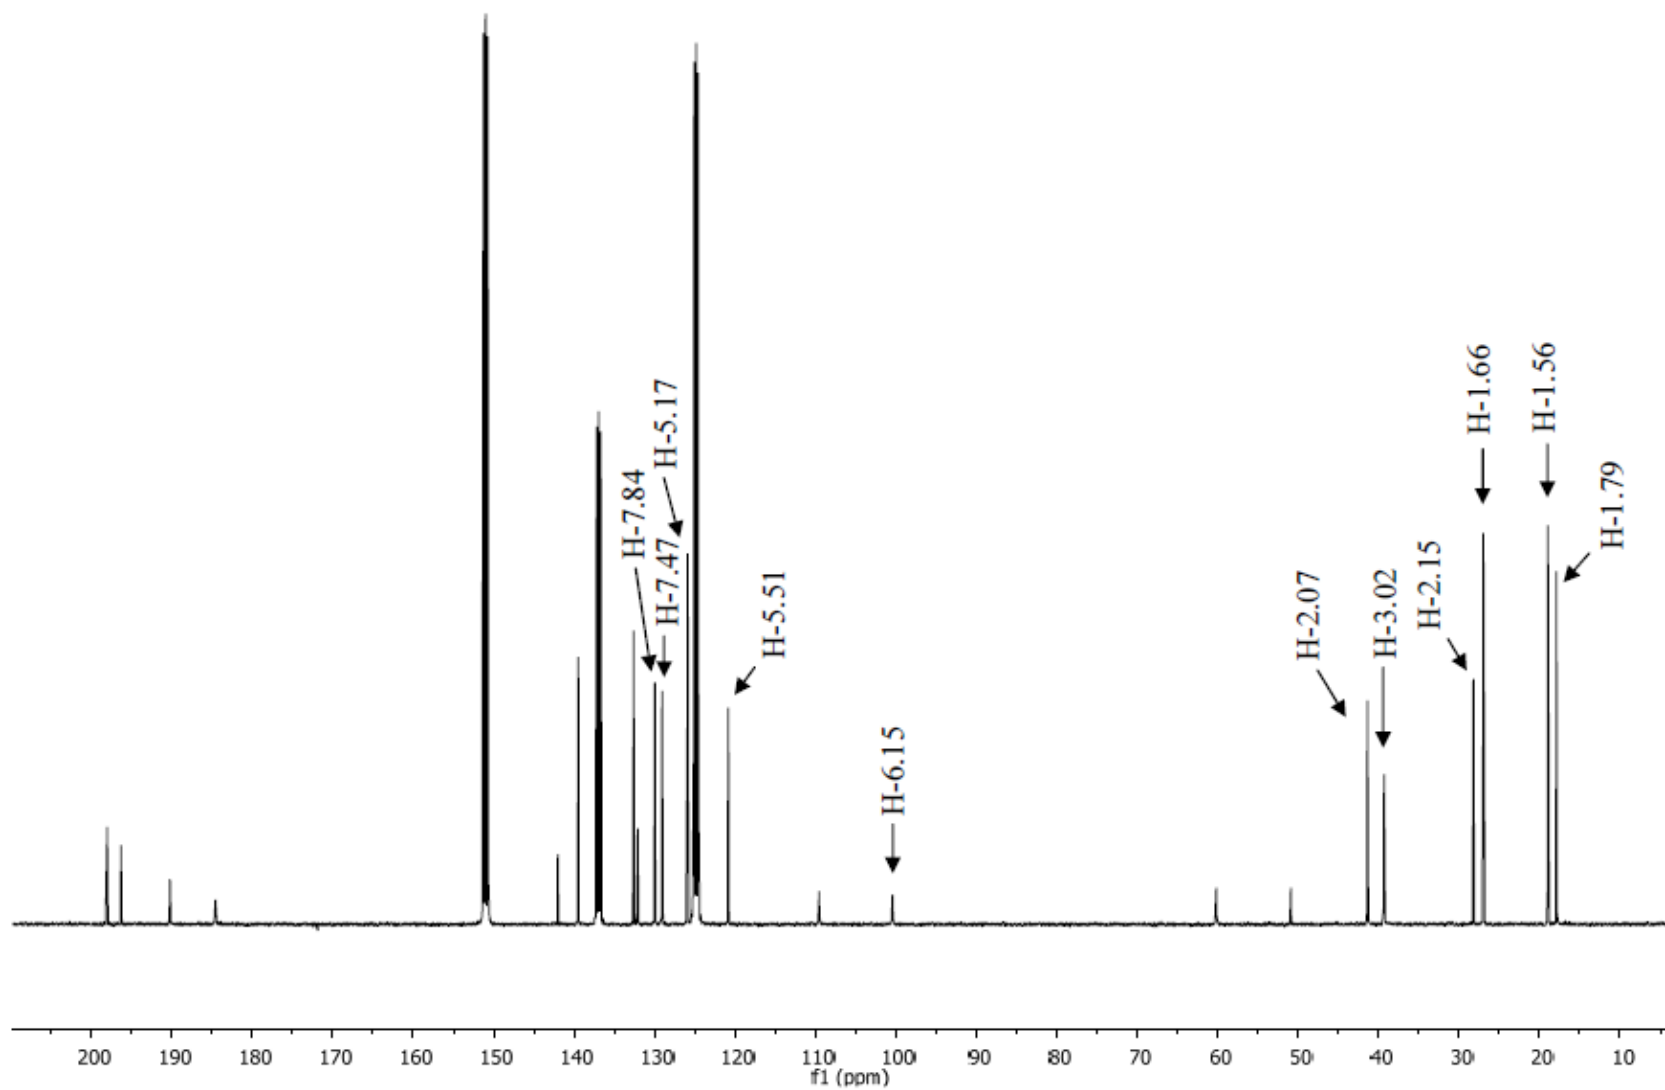

**Figure S3.**  $^{13}\text{C}$  NMR spectrum of moronone (1) in  $\text{pyridine-}d_5$ . Corresponding protons for the carbon resonances are indicated.

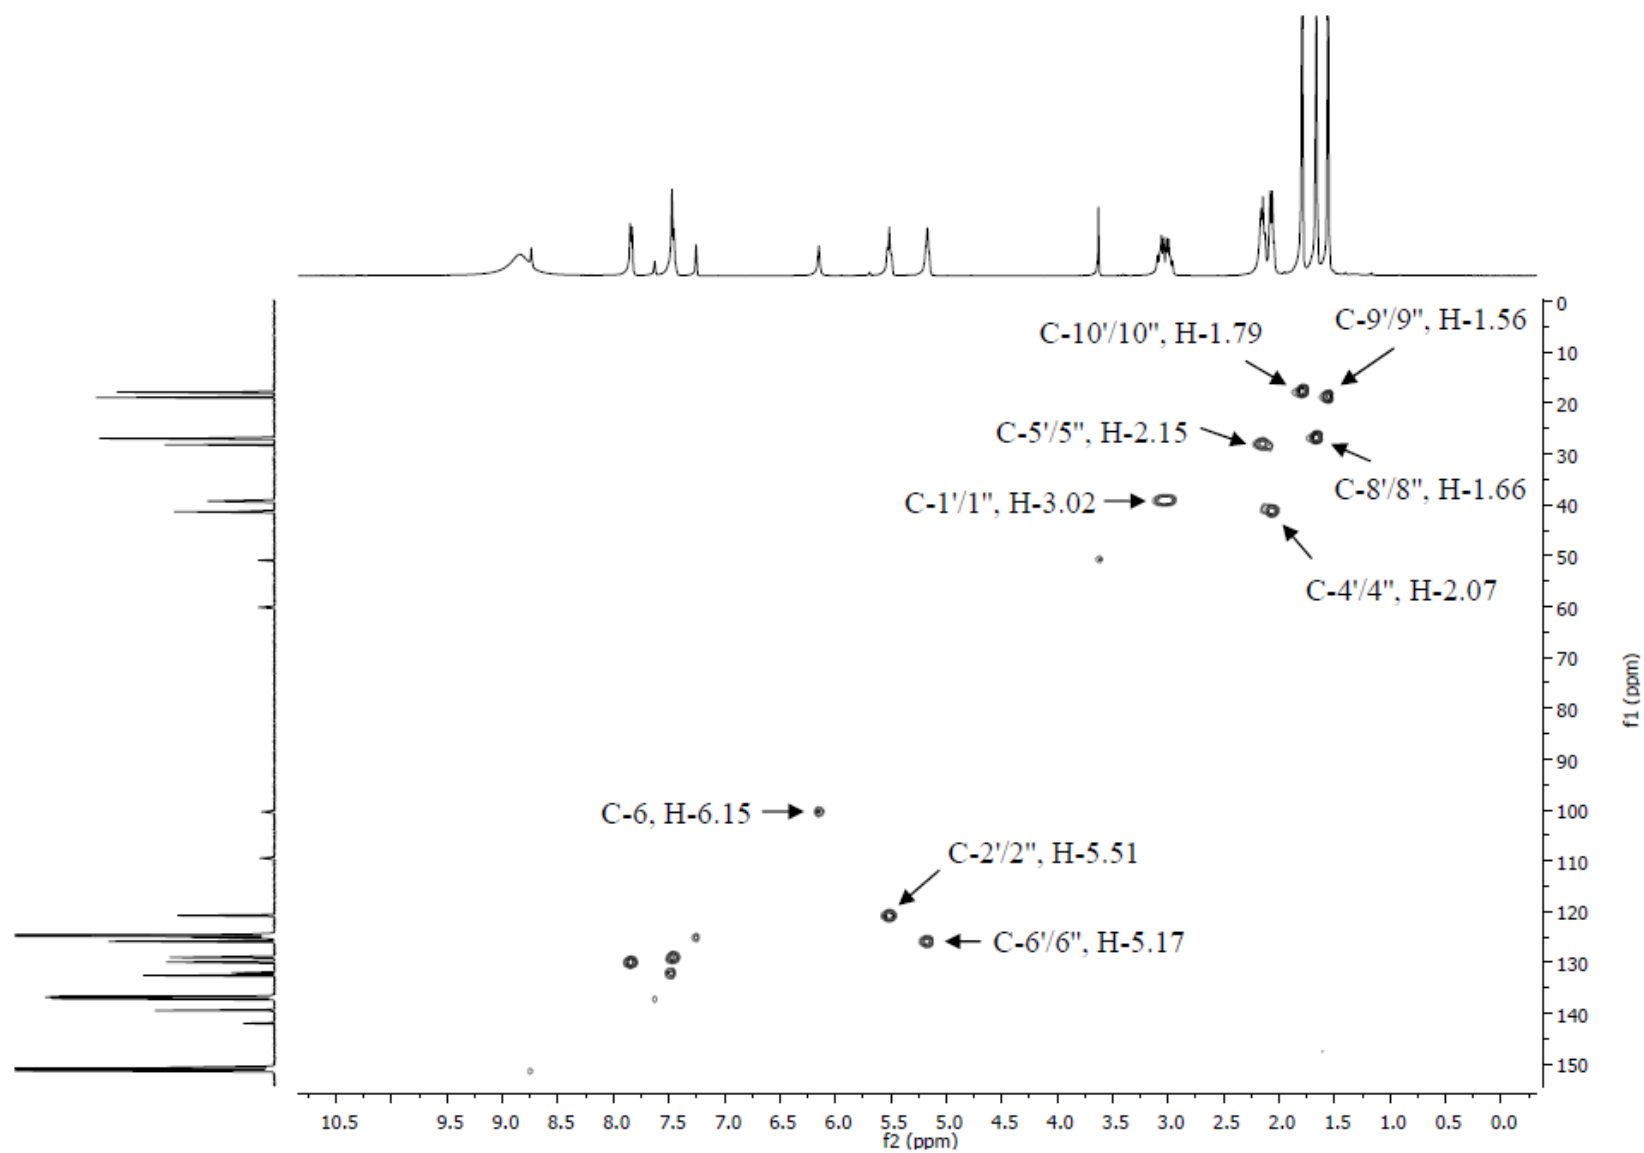

**Figure S4.** gHSQC spectrum of moronone (1) in pyridine- $d_5$

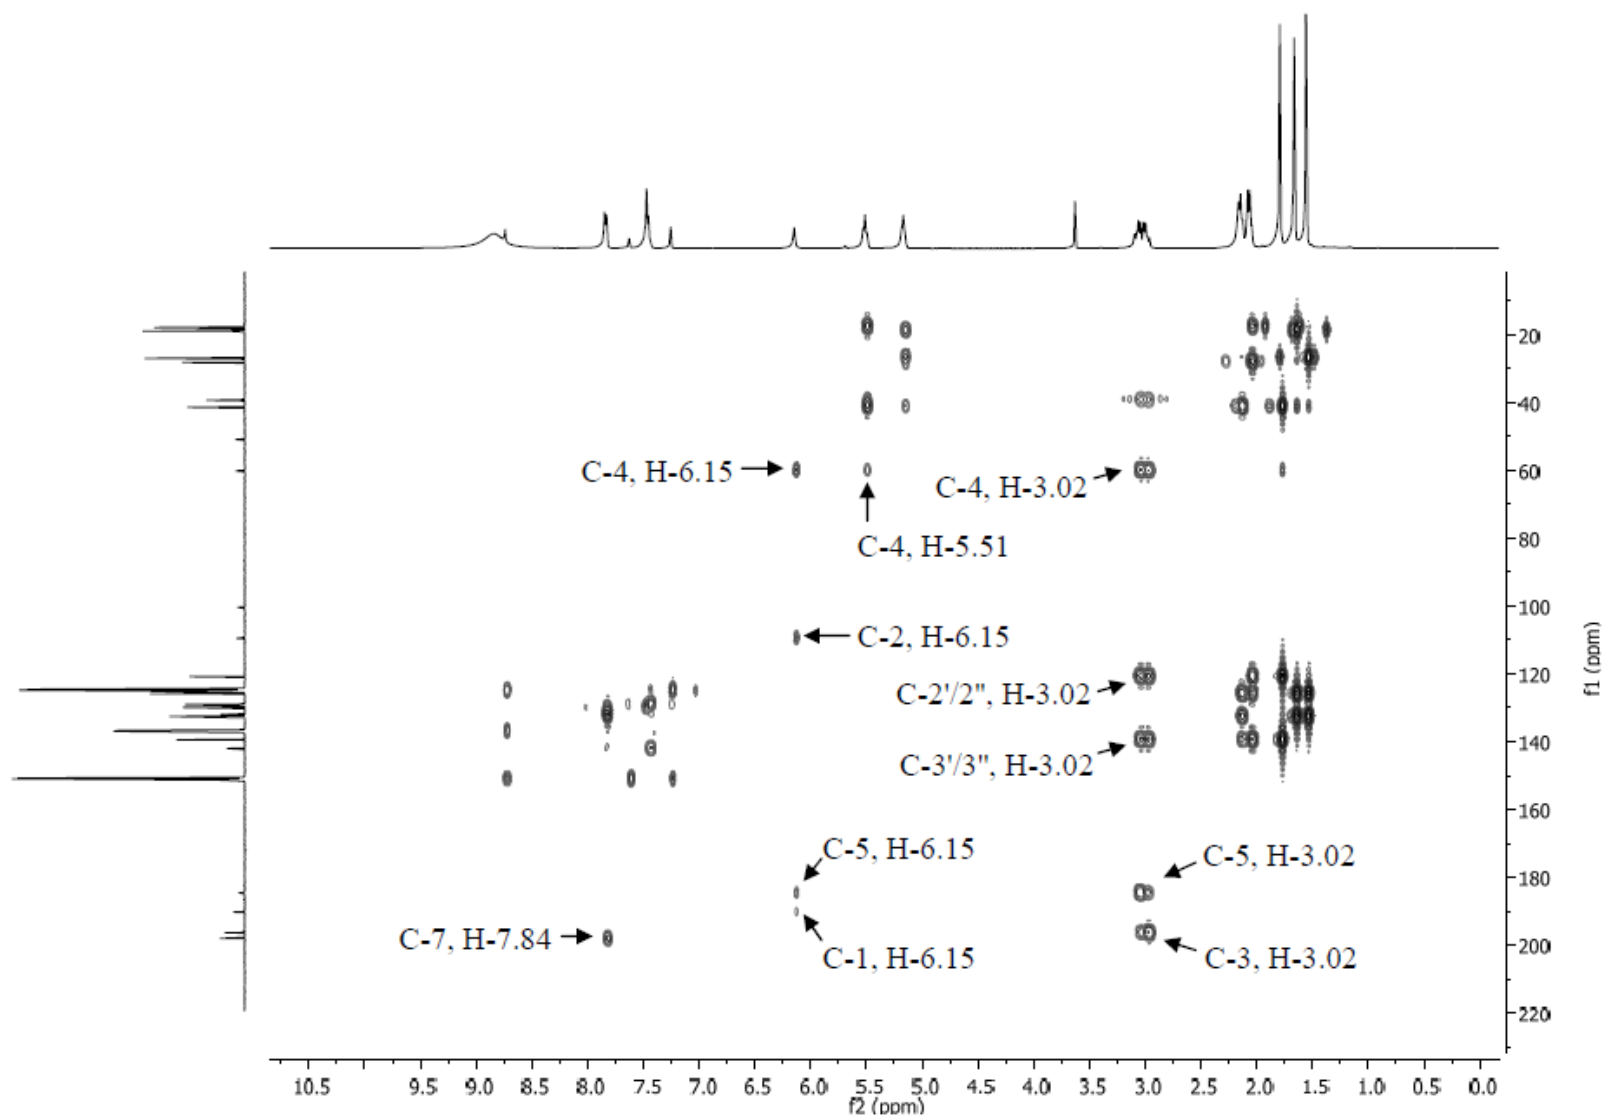

**Figure S5.** gHMBC spectrum of moronone (1) in pyridine- $d_5$

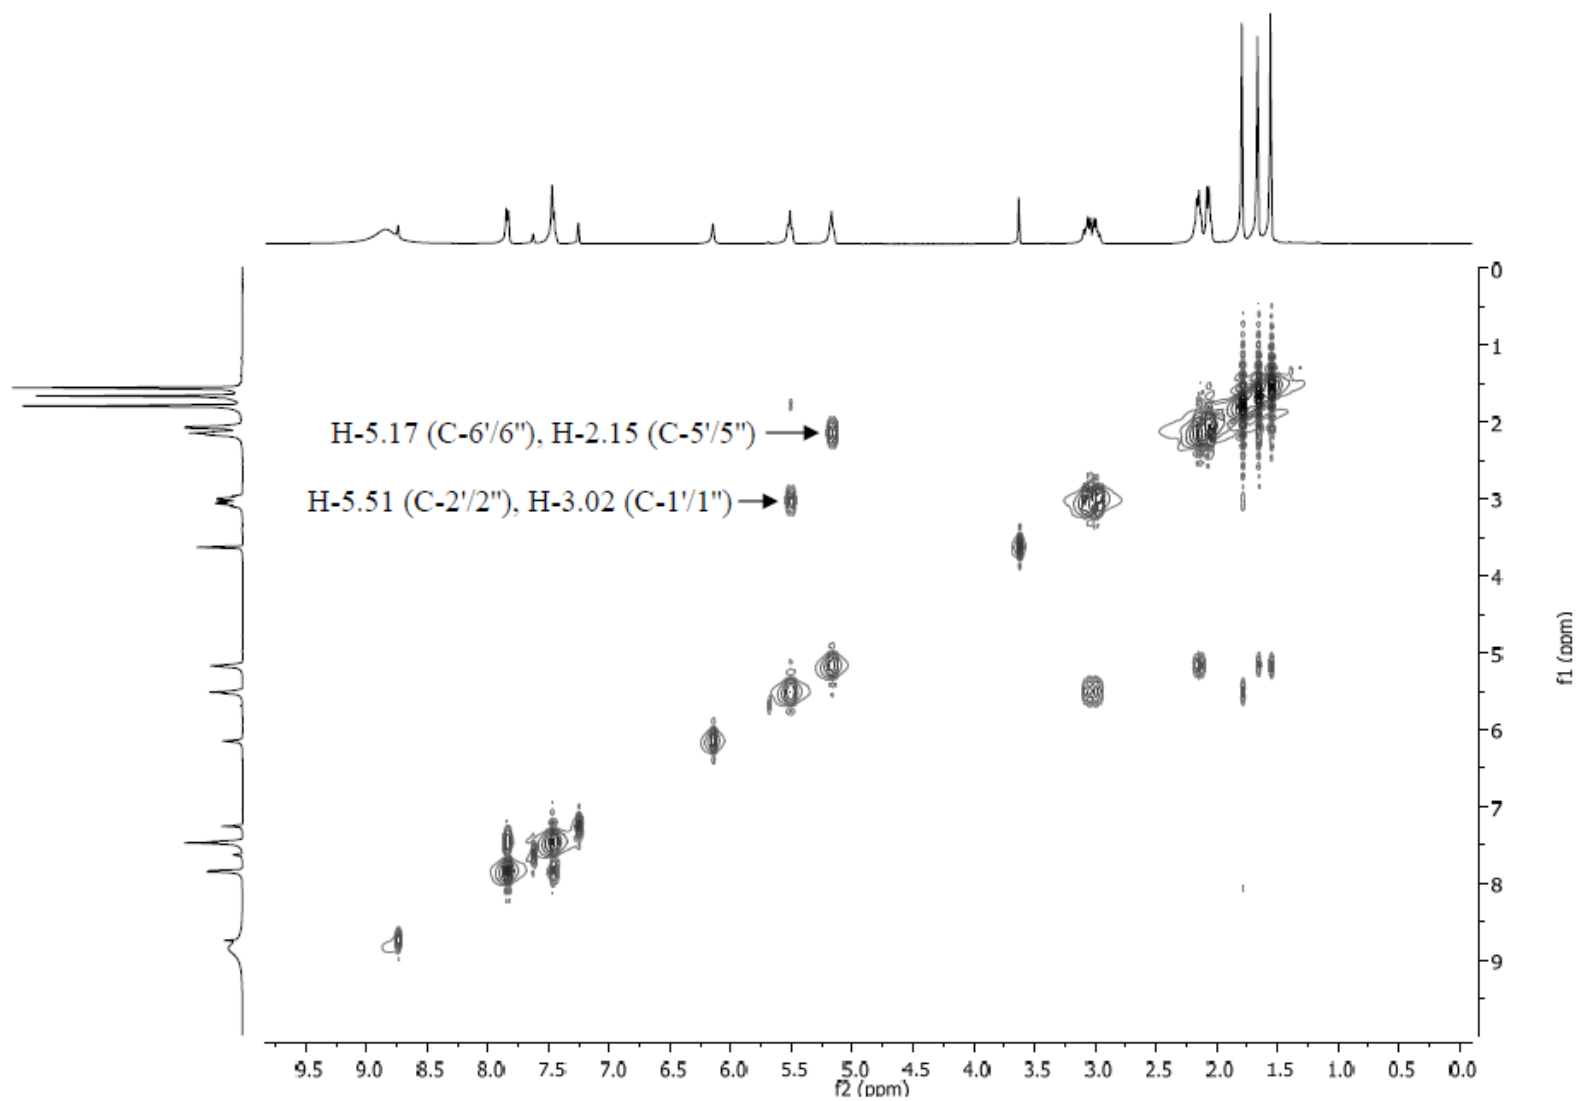

**Figure S6.** gCOSY spectrum of moronone (**1**) in pyridine- $d_5$

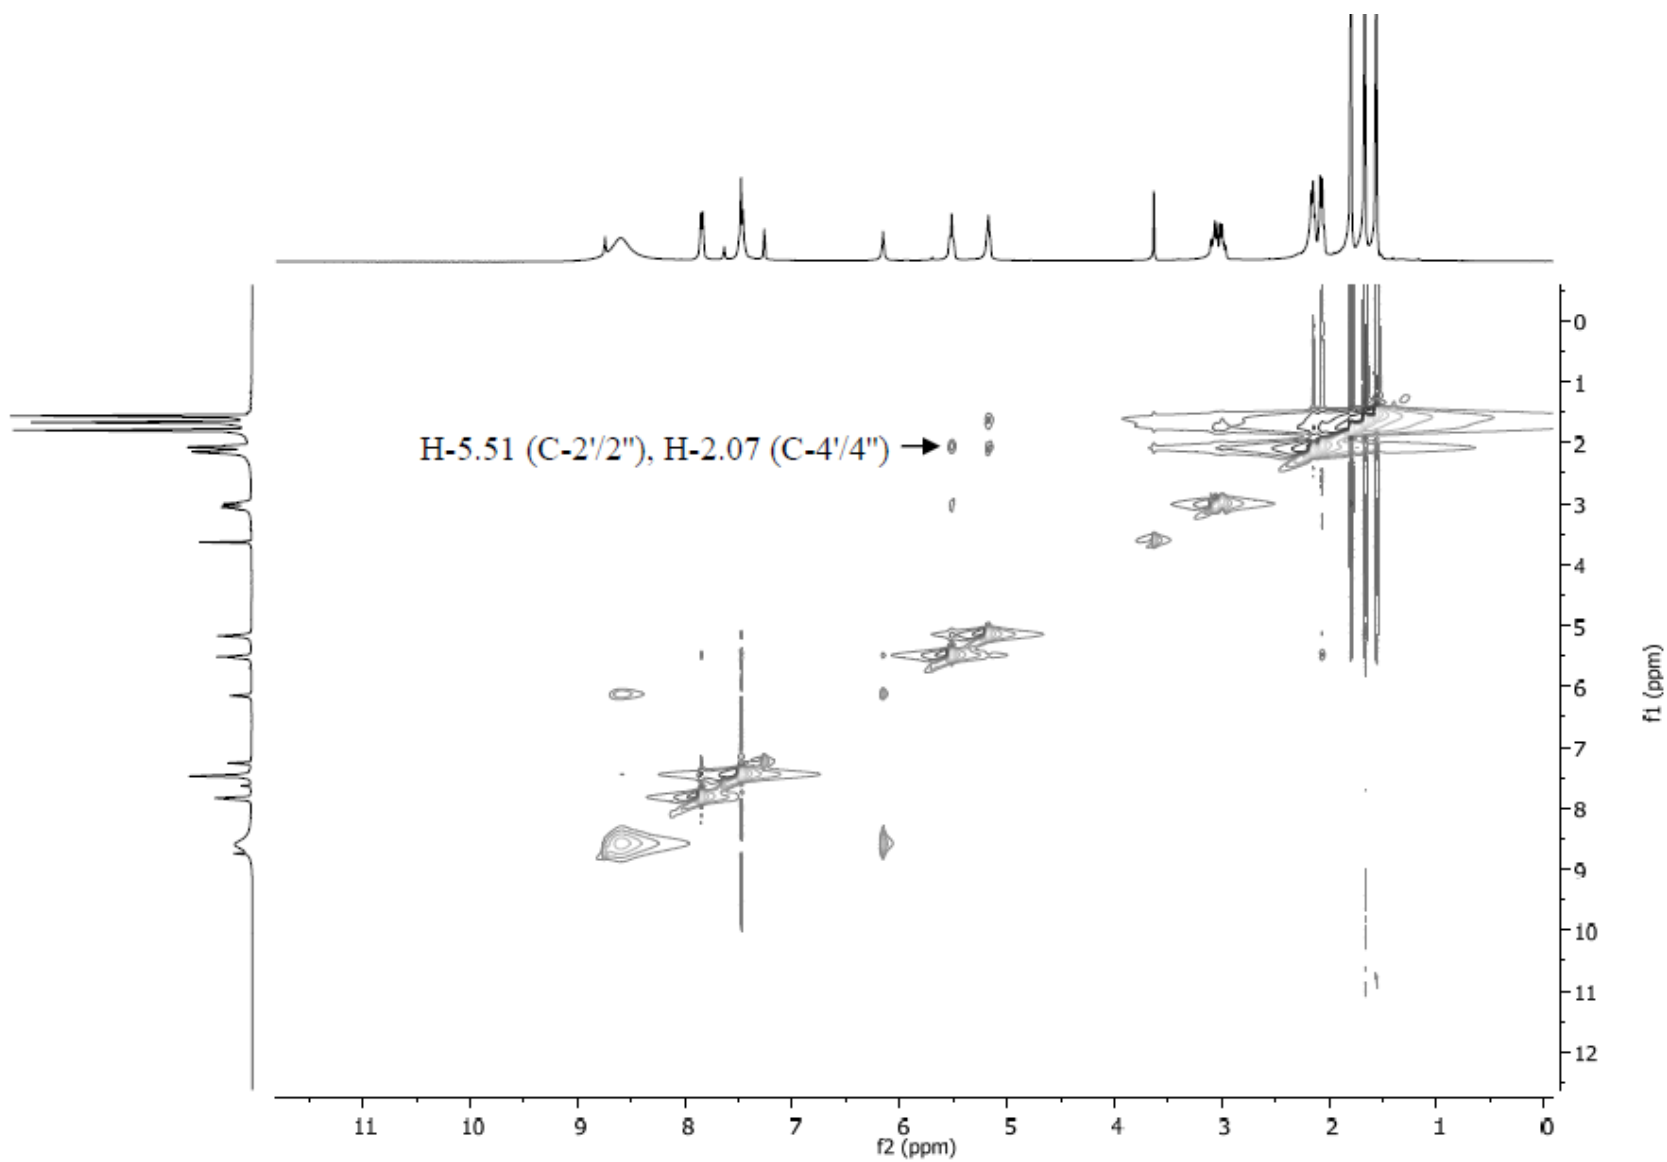

**Figure S7.** gNOESY spectrum of moronone (**1**) in pyridine
